# Supplementary material for: Habitat preferences rather than morphological traits affect the recovery process of Collembola (Arthropoda, Hexapoda) on a bare saline–alkaline land
Source: PeerJ. 2020 Jul 21;8:e9519. doi: 10.7717/peerj.9519 (PMC7380278; doi:10.7717/peerj.9519)
Supplement: Supplemental Information 1 — Treatments comprise defaunated soil blocks and with-fauna (CK treatments, WAA, WGG, and WBB) that replaced in three habitats. Three letters were used to label the treatments with fauna (W) or defaunated (O) soil blocks, and the second and third letter indicate the source and destination habitats, respectively (A = arable land, B = BSAL, and G = grassland). Destination A, G, and B indicate arable land, grassland, and BSAL. Arr, Arrhopalites; Bou, Bourletiella; Ent, Entomobrya; Fri, Friesea; Het, Heterosminthurus; Iso, Isotomiella; Lep, Lepidocyrtus; Mes, Mesaphorura; Orc, Orchesellides; Pro, Proisotoma; Pte, Ptenothrix. Raw data (named after "Coll_recov_all180_nz.csv") as the input file for R analysis. [file peerj-08-9519-s001.xlsx]

## Sheet: Sheet1
Supplementary Table S1. The abundance of each Collembola species and species richness in each treatment. Treatments comprise defaunated soil blocks and with-fauna (CK treatments, WAA, WGG, and WBB) that replaced in three habitats. Three letters were used to label the treatments with fauna (W) or defaunated (O) soil blocks, and the second and third letter indicate the source and destination habita…
name	Time	Treatment	Destination	Spnumber	Orc sp. 1	Ent sp. 1	Mes sp. 1	Het sp. 1	Bou sp. 1	Pte sp. 1	Pte sp. 2	Fri sp. 1	Arr sp. 1	Arr sp. 2	Iso sp. 1	Pro sp. 1	Lep sp. 1	Ent sp. 2
WAA1	two weeks	WAA	A	5	2	26	0	0	0	0	0	1	0	0	4	77	0	0
WAA2	two weeks	WAA	A	3	0	0	0	0	0	0	0	1	0	0	4	27	0	0
WAA3	two weeks	WAA	A	4	1	0	11	0	0	0	0	6	0	0	0	143	0	0
WAA4	two weeks	WAA	A	3	0	0	11	0	0	0	0	0	0	0	34	3	0	0
WAA5	two weeks	WAA	A	4	3	0	17	0	0	0	0	1	0	0	12	0	0	0
WAA6	seven weeks	WAA	A	5	7	0	6	0	0	0	0	6	0	0	90	25	0	0
WAA7	seven weeks	WAA	A	5	7	0	6	0	0	0	0	2	0	0	53	9	0	0
WAA8	seven weeks	WAA	A	8	4	5	39	0	0	0	0	5	0	1	9	4	2	0
WAA9	seven weeks	WAA	A	5	1	0	7	0	0	0	0	2	0	0	39	43	0	0
WAA10	seven weeks	WAA	A	5	2	0	17	0	0	0	0	0	0	0	25	5	0	4
WAA11	twelve weeks	WAA	A	8	1	0	28	0	22	3	0	12	0	0	8	9	0	2
WAA12	twelve weeks	WAA	A	11	2	1	116	0	25	4	0	31	0	1	10	33	1	1
WAA13	twelve weeks	WAA	A	7	0	1	4	0	61	0	0	11	0	2	6	15	0	0
WAA14	twelve weeks	WAA	A	8	2	2	83	0	45	2	0	25	0	0	17	263	0	0
WAA15	twelve weeks	WAA	A	8	24	0	93	0	45	2	0	18	0	1	17	14	0	0
OAA1	two weeks	OAA	A	5	5	2	0	0	0	0	0	1	1	0	2	0	0	0
OAA2	two weeks	OAA	A	6	1	0	4	0	0	0	0	2	0	0	22	12	1	0
OAA3	two weeks	OAA	A	1	0	1	0	0	0	0	0	0	0	0	0	0	0	0
OAA4	two weeks	OAA	A	8	2	5	6	0	9	0	0	1	0	1	12	7	0	0
OAA5	two weeks	OAA	A	3	0	0	6	0	0	0	0	0	0	0	13	7	0	0
OAA6	seven weeks	OAA	A	5	4	0	1	0	0	0	0	2	0	0	7	3	0	0
OAA7	seven weeks	OAA	A	6	5	0	3	0	1	0	0	2	0	0	8	2	0	0
OAA8	seven weeks	OAA	A	5	14	0	17	0	0	0	0	2	0	0	24	10	0	0
OAA9	seven weeks	OAA	A	6	8	0	7	1	0	0	0	2	0	0	26	3	0	0
OAA10	seven weeks	OAA	A	5	5	0	1	0	0	0	0	2	0	0	4	2	0	0
OAA11	twelve weeks	OAA	A	8	6	1	0	0	37	3	0	16	0	3	0	3	3	0
OAA12	twelve weeks	OAA	A	10	12	11	23	0	20	5	0	2	0	1	4	30	10	0
OAA13	twelve weeks	OAA	A	7	23	0	69	0	46	12	0	11	0	0	0	11	1	0
OAA14	twelve weeks	OAA	A	10	30	6	68	0	90	12	0	14	0	0	7	135	8	1
OAA15	twelve weeks	OAA	A	8	62	0	46	0	68	13	0	26	0	0	4	128	12	0
OGA1	two weeks	OGA	A	3	0	0	1	0	0	0	0	0	0	0	7	67	0	0
OGA2	two weeks	OGA	A	7	1	2	1	0	1	0	0	3	0	0	5	16	0	0
OGA3	two weeks	OGA	A	4	0	3	5	0	0	0	0	0	0	0	31	10	0	0
OGA4	two weeks	OGA	A	4	11	0	0	0	0	0	0	2	0	0	8	414	0	0
OGA5	two weeks	OGA	A	6	20	0	2	0	0	0	0	1	0	0	1	524	14	0
OGA6	seven weeks	OGA	A	5	17	0	0	0	0	0	0	17	0	0	6	48	43	0
OGA7	seven weeks	OGA	A	7	35	0	0	1	1	0	0	13	0	2	7	134	0	0
OGA8	seven weeks	OGA	A	5	23	0	0	1	0	0	0	2	0	0	0	123	1	0
OGA9	seven weeks	OGA	A	7	30	0	3	1	0	0	0	86	0	1	0	77	18	0
OGA10	seven weeks	OGA	A	6	6	0	1	0	0	0	0	4	0	1	0	352	11	0
OGA11	twelve weeks	OGA	A	9	2	4	23	0	41	12	0	9	1	0	1	19	0	0
OGA12	twelve weeks	OGA	A	9	3	0	18	0	7	0	0	4	0	1	1	20	2	1
OGA13	twelve weeks	OGA	A	8	44	0	45	0	61	13	0	21	0	0	3	293	45	0
OGA14	twelve weeks	OGA	A	9	0	19	149	0	58	1	0	23	0	1	5	289	24	0
OGA15	twelve weeks	OGA	A	8	15	0	12	0	48	4	0	12	0	3	0	15	9	0
OBA1	two weeks	OBA	A	3	1	0	1	0	0	0	0	0	0	0	0	7	0	0
OBA2	two weeks	OBA	A	3	0	0	3	0	0	0	0	0	1	0	0	1	0	0
OBA3	two weeks	OBA	A	5	1	0	6	0	0	1	0	0	0	0	2	3	0	0
OBA4	two weeks	OBA	A	4	7	0	0	0	0	0	0	2	0	0	14	103	0	0
OBA5	two weeks	OBA	A	4	3	0	0	0	0	0	0	0	0	0	2	7	1	0
OBA6	seven weeks	OBA	A	6	1	0	0	2	0	0	0	1	0	1	2	34	0	0
OBA7	seven weeks	OBA	A	4	0	8	0	0	0	0	0	0	0	0	3	13	3	0
OBA8	seven weeks	OBA	A	3	4	0	0	0	0	0	0	1	0	0	0	7	0	0
OBA9	seven weeks	OBA	A	4	8	0	0	0	0	0	0	2	0	0	12	17	0	0
OBA10	seven weeks	OBA	A	5	4	0	0	2	0	0	0	1	0	0	9	16	0	0
OBA11	twelve weeks	OBA	A	9	23	14	31	0	16	0	0	16	4	0	0	276	20	1
OBA12	twelve weeks	OBA	A	10	11	0	48	0	16	1	0	5	0	1	3	305	38	1
OBA13	twelve weeks	OBA	A	7	9	0	10	0	8	0	0	12	0	0	0	122	9	1
OBA14	twelve weeks	OBA	A	7	3	0	11	0	8	0	0	3	0	0	4	66	4	0
OBA15	twelve weeks	OBA	A	8	10	0	42	0	11	0	0	7	0	3	7	139	13	0
WGG1	two weeks	WGG	G	4	5	0	1	0	1	0	0	0	0	0	0	43	0	0
WGG2	two weeks	WGG	G	6	14	3	0	0	2	0	0	1	0	0	3	138	0	0
WGG3	two weeks	WGG	G	5	0	7	36	0	2	0	0	1	0	0	0	13	0	0
WGG4	two weeks	WGG	G	4	0	0	1	0	0	0	0	1	0	0	0	1	1	0
WGG5	two weeks	WGG	G	3	0	6	6	0	0	0	0	0	0	0	0	0	1	0
WGG6	seven weeks	WGG	G	5	17	0	260	0	0	0	0	6	19	0	2	0	0	0
WGG7	seven weeks	WGG	G	3	0	0	11	0	0	0	0	0	2	0	0	2	0	0
WGG8	seven weeks	WGG	G	2	0	0	56	0	0	0	0	0	2	0	0	0	0	0
WGG9	seven weeks	WGG	G	1	0	0	29	0	0	0	0	0	0	0	0	0	0	0
WGG10	seven weeks	WGG	G	5	1	0	62	0	0	0	0	3	13	0	12	0	0	0
WGG11	twelve weeks	WGG	G	4	0	0	4	0	3	0	0	1	0	1	0	0	0	0
WGG12	twelve weeks	WGG	G	4	2	0	28	0	18	0	0	0	0	9	0	0	0	0
WGG13	twelve weeks	WGG	G	2	0	0	35	0	0	0	0	0	2	0	0	0	0	0
WGG14	twelve weeks	WGG	G	4	0	0	7	0	2	0	0	2	0	2	0	0	0	0
WGG15	twelve weeks	WGG	G	4	0	0	38	0	10	0	0	0	0	3	0	1	0	0
OGG1	two weeks	OGG	G	5	1	1	0	0	0	0	1	1	0	0	0	21	0	0
OGG2	two weeks	OGG	G	6	10	0	4	0	1	0	0	20	0	0	0	123	1	0
OGG3	two weeks	OGG	G	3	0	3	0	0	0	0	0	27	0	0	0	92	0	0
OGG4	two weeks	OGG	G	4	0	7	4	0	4	0	0	0	0	0	0	2	0	0
OGG5	two weeks	OGG	G	3	0	0	2	0	0	0	0	1	0	0	0	80	0	0
OGG6	seven weeks	OGG	G	5	6	0	94	0	0	0	0	5	0	0	11	5	0	0
OGG7	seven weeks	OGG	G	5	60	0	25	0	0	0	0	1	0	0	0	7	0	2
OGG8	seven weeks	OGG	G	6	3	0	144	0	0	0	0	2	0	1	24	5	0	0
OGG9	seven weeks	OGG	G	5	4	0	4	0	0	0	0	0	0	3	4	3	0	0
OGG10	seven weeks	OGG	G	6	42	0	60	0	0	0	0	9	0	1	21	72	0	0
OGG11	twelve weeks	OGG	G	4	0	0	79	0	3	0	0	3	0	0	0	1	0	0
OGG12	twelve weeks	OGG	G	2	0	0	81	0	0	0	0	0	0	1	0	0	0	0
OGG13	twelve weeks	OGG	G	5	2	0	5	0	2	0	0	1	0	1	0	0	0	0
OGG14	twelve weeks	OGG	G	4	0	0	15	0	1	0	0	1	0	0	0	0	6	0
OGG15	twelve weeks	OGG	G	5	0	0	0	0	3	0	0	2	2	0	0	2	26	0
OAG1	two weeks	OAG	G	5	1	3	0	0	3	0	0	3	0	0	0	3	0	0
OAG2	two weeks	OAG	G	5	2	11	9	0	0	0	0	1	0	0	0	1	0	0
OAG3	two weeks	OAG	G	4	0	1	3	0	0	0	0	2	0	0	0	4	0	0
OAG4	two weeks	OAG	G	5	0	1	2	0	1	0	0	6	0	0	0	13	0	0
OAG5	two weeks	OAG	G	7	1	0	12	0	1	1	0	4	0	0	0	2	1	0
OAG6	seven weeks	OAG	G	5	2	0	4	0	0	0	0	1	1	0	1	0	0	0
OAG7	seven weeks	OAG	G	5	4	0	10	0	0	0	0	1	0	0	0	1	0	1
OAG8	seven weeks	OAG	G	5	3	0	12	0	0	0	0	2	0	0	0	7	0	1
OAG9	seven weeks	OAG	G	4	2	0	9	0	0	0	0	6	0	0	0	0	0	1
OAG10	seven weeks	OAG	G	3	1	0	6	0	0	0	0	0	0	0	0	1	0	0
OAG11	twelve weeks	OAG	G	3	1	0	7	0	1	0	0	0	0	0	0	0	0	0
OAG12	twelve weeks	OAG	G	4	0	0	7	0	7	0	0	0	0	7	0	1	0	0
OAG13	twelve weeks	OAG	G	5	0	0	122	0	11	0	0	1	0	5	0	1	0	0
OAG14	twelve weeks	OAG	G	3	0	0	15	0	1	0	0	0	0	0	0	1	0	0
OAG15	twelve weeks	OAG	G	5	0	0	55	0	10	0	0	2	0	3	0	2	0	0
OBG1	two weeks	OBG	G	5	0	3	3	0	0	0	0	3	0	0	0	2	1	0
OBG2	two weeks	OBG	G	5	0	3	1	0	0	0	1	1	0	0	0	3	0	0
OBG3	two weeks	OBG	G	2	0	1	0	0	0	0	1	0	0	0	0	0	0	0
OBG4	two weeks	OBG	G	5	0	2	0	0	1	0	0	1	0	0	0	6	1	0
OBG5	two weeks	OBG	G	4	0	2	0	0	1	0	0	3	0	0	0	5	0	0
OBG6	seven weeks	OBG	G	3	2	0	8	0	0	0	0	0	0	0	0	1	0	0
OBG7	seven weeks	OBG	G	4	3	0	1	0	0	0	0	2	0	0	0	3	0	0
OBG8	seven weeks	OBG	G	5	16	0	15	0	0	0	0	6	0	0	19	3	0	0
OBG9	seven weeks	OBG	G	6	5	0	5	0	0	0	0	1	0	0	2	12	0	2
OBG10	seven weeks	OBG	G	3	0	0	31	0	0	0	0	5	0	0	0	7	0	0
OBG11	twelve weeks	OBG	G	2	0	0	4	0	0	0	0	0	0	0	0	0	0	1
OBG12	twelve weeks	OBG	G	4	0	0	23	0	1	0	0	3	0	0	0	2	0	0
OBG13	twelve weeks	OBG	G	5	2	0	19	0	2	0	0	2	0	0	0	4	0	0
OBG14	twelve weeks	OBG	G	5	2	0	7	0	1	0	0	2	0	1	0	0	0	0
OBG15	twelve weeks	OBG	G	2	0	0	9	0	2	0	0	0	0	0	0	0	0	0
WBB1	two weeks	WBB	B	2	0	0	0	0	0	0	0	1	0	0	0	1	0	0
WBB2	two weeks	WBB	B	1	0	0	0	0	0	0	0	2	0	0	0	0	0	0
WBB3	two weeks	WBB	B	1	0	0	0	0	0	0	0	0	0	0	0	1	0	0
WBB4	two weeks	WBB	B	1	0	0	0	0	0	0	0	0	0	0	0	1	0	0
WBB5	two weeks	WBB	B	2	0	0	0	0	0	4	0	0	0	0	0	1	0	0
WBB6	seven weeks	WBB	B	2	0	0	0	0	0	0	0	1	0	0	0	2	0	0
WBB7	seven weeks	WBB	B	1	0	0	29	0	0	0	0	0	0	0	0	0	0	0
WBB8	seven weeks	WBB	B	1	0	2	0	0	0	0	0	0	0	0	0	0	0	0
WBB9	seven weeks	WBB	B	2	0	0	10	0	0	0	0	0	0	0	1	0	0	0
WBB10	seven weeks	WBB	B	1	0	0	2	0	0	0	0	0	0	0	0	0	0	0
WBB11	twelve weeks	WBB	B	2	1	0	6	0	0	0	0	0	0	0	0	0	0	0
WBB12	twelve weeks	WBB	B	3	0	0	103	0	0	0	0	5	0	0	0	0	0	3
WBB13	twelve weeks	WBB	B	2	1	0	0	0	0	0	0	1	0	0	0	0	0	0
WBB14	twelve weeks	WBB	B	2	1	1	0	0	0	0	0	0	0	0	0	0	0	0
WBB15	twelve weeks	WBB	B	2	0	0	13	0	0	0	0	14	0	0	0	0	0	0
OBB1	two weeks	OBB	B	1	1	0	0	0	0	0	0	0	0	0	0	0	0	0
OBB2	two weeks	OBB	B	0	0	0	0	0	0	0	0	0	0	0	0	0	0	0
OBB3	two weeks	OBB	B	2	0	0	0	0	0	0	0	0	0	0	2	2	0	0
OBB4	two weeks	OBB	B	2	0	1	0	0	0	0	0	0	0	0	0	1	0	0
OBB5	two weeks	OBB	B	2	1	0	0	0	0	0	0	0	0	0	0	1	0	0
OBB6	seven weeks	OBB	B	1	0	0	0	0	0	0	0	1	0	0	0	0	0	0
OBB7	seven weeks	OBB	B	1	0	0	1	0	0	0	0	0	0	0	0	0	0	0
OBB8	seven weeks	OBB	B	1	0	0	0	0	0	0	0	0	1	0	0	0	0	0
OBB9	seven weeks	OBB	B	0	0	0	0	0	0	0	0	0	0	0	0	0	0	0
OBB10	seven weeks	OBB	B	1	1	0	0	0	0	0	0	0	0	0	0	0	0	0
OBB11	twelve weeks	OBB	B	3	0	0	2	0	0	0	0	5	0	0	0	0	0	1
OBB12	twelve weeks	OBB	B	1	0	0	0	0	0	0	0	1	0	0	0	0	0	0
OBB13	twelve weeks	OBB	B	3	0	0	1	0	0	0	0	2	0	0	0	0	0	2
OBB14	twelve weeks	OBB	B	1	0	0	0	0	0	0	0	2	0	0	0	0	0	0
OBB15	twelve weeks	OBB	B	2	1	0	0	0	0	0	0	1	0	0	0	0	0	0
OAB1	two weeks	OAB	B	4	0	17	3	0	0	0	1	0	0	0	0	4	0	0
OAB2	two weeks	OAB	B	1	0	0	0	0	0	0	0	0	0	0	0	0	3	0
OAB3	two weeks	OAB	B	1	0	0	0	0	0	0	0	0	0	0	0	4	0	0
OAB4	two weeks	OAB	B	3	5	0	0	0	0	2	0	0	0	0	0	2	0	0
OAB5	two weeks	OAB	B	3	4	0	0	0	0	1	0	0	0	0	0	4	0	0
OAB6	seven weeks	OAB	B	2	12	0	0	0	0	0	0	0	0	0	0	1	0	0
OAB7	seven weeks	OAB	B	1	0	0	0	0	0	0	0	0	0	0	0	4	0	0
OAB8	seven weeks	OAB	B	4	0	1	9	0	0	0	0	1	0	0	0	3	0	0
OAB9	seven weeks	OAB	B	3	2	0	0	0	0	0	0	0	0	0	2	4	0	0
OAB10	seven weeks	OAB	B	4	7	0	1	0	0	0	0	0	0	0	1	7	0	0
OAB11	twelve weeks	OAB	B	1	0	0	0	0	0	0	0	0	0	0	0	93	0	0
OAB12	twelve weeks	OAB	B	1	0	0	0	0	0	0	0	1	0	0	0	0	0	0
OAB13	twelve weeks	OAB	B	3	0	0	0	0	0	0	0	1	0	0	1	7	0	0
OAB14	twelve weeks	OAB	B	2	0	0	2	0	0	0	0	0	0	0	0	0	0	1
OAB15	twelve weeks	OAB	B	3	0	0	1	0	0	0	0	2	0	0	0	8	0	0
OGB1	two weeks	OGB	B	4	0	4	0	0	0	1	0	1	0	0	0	144	0	0
OGB2	two weeks	OGB	B	3	0	2	0	0	0	2	0	0	0	0	0	60	0	0
OGB3	two weeks	OGB	B	3	0	1	0	0	0	1	0	0	0	0	0	57	0	0
OGB4	two weeks	OGB	B	2	0	0	0	0	0	1	0	0	0	0	0	1	0	0
OGB5	two weeks	OGB	B	2	0	0	0	0	0	0	0	2	0	0	0	46	0	0
OGB6	seven weeks	OGB	B	3	0	0	0	0	0	0	0	14	0	0	18	198	0	0
OGB7	seven weeks	OGB	B	2	0	0	0	0	0	0	0	12	0	0	0	74	0	0
OGB8	seven weeks	OGB	B	2	0	0	0	0	0	0	0	11	0	0	0	511	0	0
OGB9	seven weeks	OGB	B	2	0	0	0	0	0	0	0	4	0	0	0	236	0	0
OGB10	seven weeks	OGB	B	3	0	1	0	0	0	0	0	1	0	0	0	112	0	0
OGB11	twelve weeks	OGB	B	4	0	0	1	0	0	0	0	23	0	0	0	10	0	3
OGB12	twelve weeks	OGB	B	3	0	0	0	0	0	0	0	10	0	0	0	13	0	3
OGB13	twelve weeks	OGB	B	3	0	0	0	0	0	0	0	13	0	0	0	3	0	6
OGB14	twelve weeks	OGB	B	3	0	0	0	0	0	0	0	1	0	0	0	7	0	1
OGB15	twelve weeks	OGB	B	2	0	0	0	0	0	0	0	10	0	0	0	18	0	0
