# Supplementary material for: Habitat preferences rather than morphological traits affect the recovery process of Collembola (Arthropoda, Hexapoda) on a bare saline–alkaline land
Source: PeerJ. 2020 Jul 21;8:e9519. doi: 10.7717/peerj.9519 (PMC7380278; doi:10.7717/peerj.9519)
Supplement: Supplemental Information 3 — Three letters were used to label the treatments with fauna (W) or defaunated (O) soil blocks, and the second and third letter indicate the source and destination habitats, respectively (B = bare saline-alkaline land, G = grassland, and A = arable land). Significant levels are marked as *, p<0.05; **, 0.01 [file peerj-08-9519-s003.xlsx]

## Sheet: Sheet1
Supplementary Table S3. Results of PERMANOVA between defaunated soil blocks and with-fauna (CK treatments, WAA, WGG, and WBB) that replaced in three habitats. Three letters were used to label the treatments with fauna (W) or defaunated (O) soil blocks, and the second and third letter indicate the source and destination habitats, respectively (B = bare saline-alkaline land, G = grassland, and A = …
Sampling time (weeks)	Compared treatments	Df	Sums of squares	F.Model	R2	p value
Two	WAA & OAA	1	0.345	1.179	0.128	0.313
	WAA & OGA	1	0.178	0.622	0.072	0.62
	WAA & OBA	1	0.444	1.578	0.165	0.181
Seven	WAA & OAA	1	0.434	3.729	0.318	0.031*
	WAA & OGA	1	1.126	8.588	0.518	0.012*
	WAA & OBA	1	0.683	5.179	0.393	0.006**
Twelve	WAA & OAA	1	0.124	0.92	0.103	0.473
	WAA & OGA	1	0.133	0.836	0.095	0.339
	WAA & OBA	1	0.607	5.638	0.413	0.017*
Two	WGG & OGG	1	0.19	0.638	0.074	0.564
	WGG & OAG	1	0.375	1.427	0.151	0.209
	WGG & OBG	1	0.581	2.226	0.218	0.038*
Seven	WGG & OGG	1	0.32	1.504	0.158	0.173
	WGG & OAG	1	0.762	5.248	0.396	0.01**
	WGG & OBG	1	0.583	2.865	0.264	0.044*
Twelve	WGG & OGG	1	0.199	0.842	0.095	0.424
	WGG & OAG	1	0.064	0.328	0.039	0.876
	WGG & OBG	1	0.186	1.173	0.128	0.296
Two	WBB & OBB	1	0.419	1.643	0.19	0.168
	WBB & OAB	1	0.75	2.624	0.247	0.017*
	WBB & OGB	1	1.109	4.828	0.376	0.027*
Seven	WBB & OBB	1	0.404	0.885	0.112	0.606
	WBB & OAB	1	0.638	1.964	0.197	0.102
	WBB & OGB	1	1.403	5.311	0.399	0.005**
Twelve	WBB & OBB	1	0.711	2.727	0.254	0.028*
	WBB & OAB	1	0.696	1.903	0.192	0.042*
	WBB & OGB	1	1.12	4.89	0.379	0.012*
