# Supplementary material for: Habitat preferences rather than morphological traits affect the recovery process of Collembola (Arthropoda, Hexapoda) on a bare saline–alkaline land
Source: PeerJ. 2020 Jul 21;8:e9519. doi: 10.7717/peerj.9519 (PMC7380278; doi:10.7717/peerj.9519)
Supplement: Supplemental Information 4 [file peerj-08-9519-s004.xlsx]

## Sheet: Sheet1
Supplementary Table S4. Total species and abundance of Collembola recovered in five soil blocks.
Treatment	Sampling time (weeks)	Species number	Generalist species						Arable land preferring species			Arable land specialist		Grassland specialist	-	-
			Arr sp. 2	Bou sp. 1	Ent sp. 1	Lep sp. 1	Mes sp. 1	Orc sp. 1	Fri sp. 1	Iso sp. 1	Pro sp. 1	Ent sp. 2	Pte sp. 1	Arr sp. 1	Het sp. 1	Pte sp. 2
OAA	Two	10	1	9	8	1	16	8	4	49	26			1
	Seven	7		1			29	36	10	69	20				1
	Twelve	11	4	261	18	34	206	133	69	15	307	1	45
WAA	Two	6			26		39	6	9	54	250
	Seven	9	1		5	2	75	21	15	216	86	4
	Twelve	11	4	198	4	1	324	29	97	58	334	3	11
OGG	Two	8		5	11	1	10	11	49		318					1
	Seven	7	5				327	115	17	60	92	2
	Twelve	8	2	9		32	180	2	7		3			2
WGG	Two	8		5	16	2	44	19	3	3	195
	Seven	6					418	18	9	14	2			36
	Twelve	7	15	33			112	2	3		1			2
OBB	Two	4			1			2		2	4
	Seven	4					1	1	1					1
	Twelve	4					3	1	11			3
WBB	Two	3							3		4		4
	Seven	5			2		41		1	1	2
	Twelve	5		1			122	3	20				3
Arr, Arrhopalites; Bou, Bourletiella; Ent, Entomobrya; Fri, Friesea; Het, Heterosminthurus; Iso, Isotomiella; Lep, Lepidocyrtus; Mes, Mesaphorura; Orc, Orchesellides; Pro, Proisotoma; Pte, Ptenothrix.
